# Supplementary figures and images for: Controls on Palaeogene deep-sea diatom-bearing sediment deposition and comparison with shallow marine environments
Source: Copernicus journal article supplement (doi:10.5194/egusphere-2024-3768), 2024-12-17

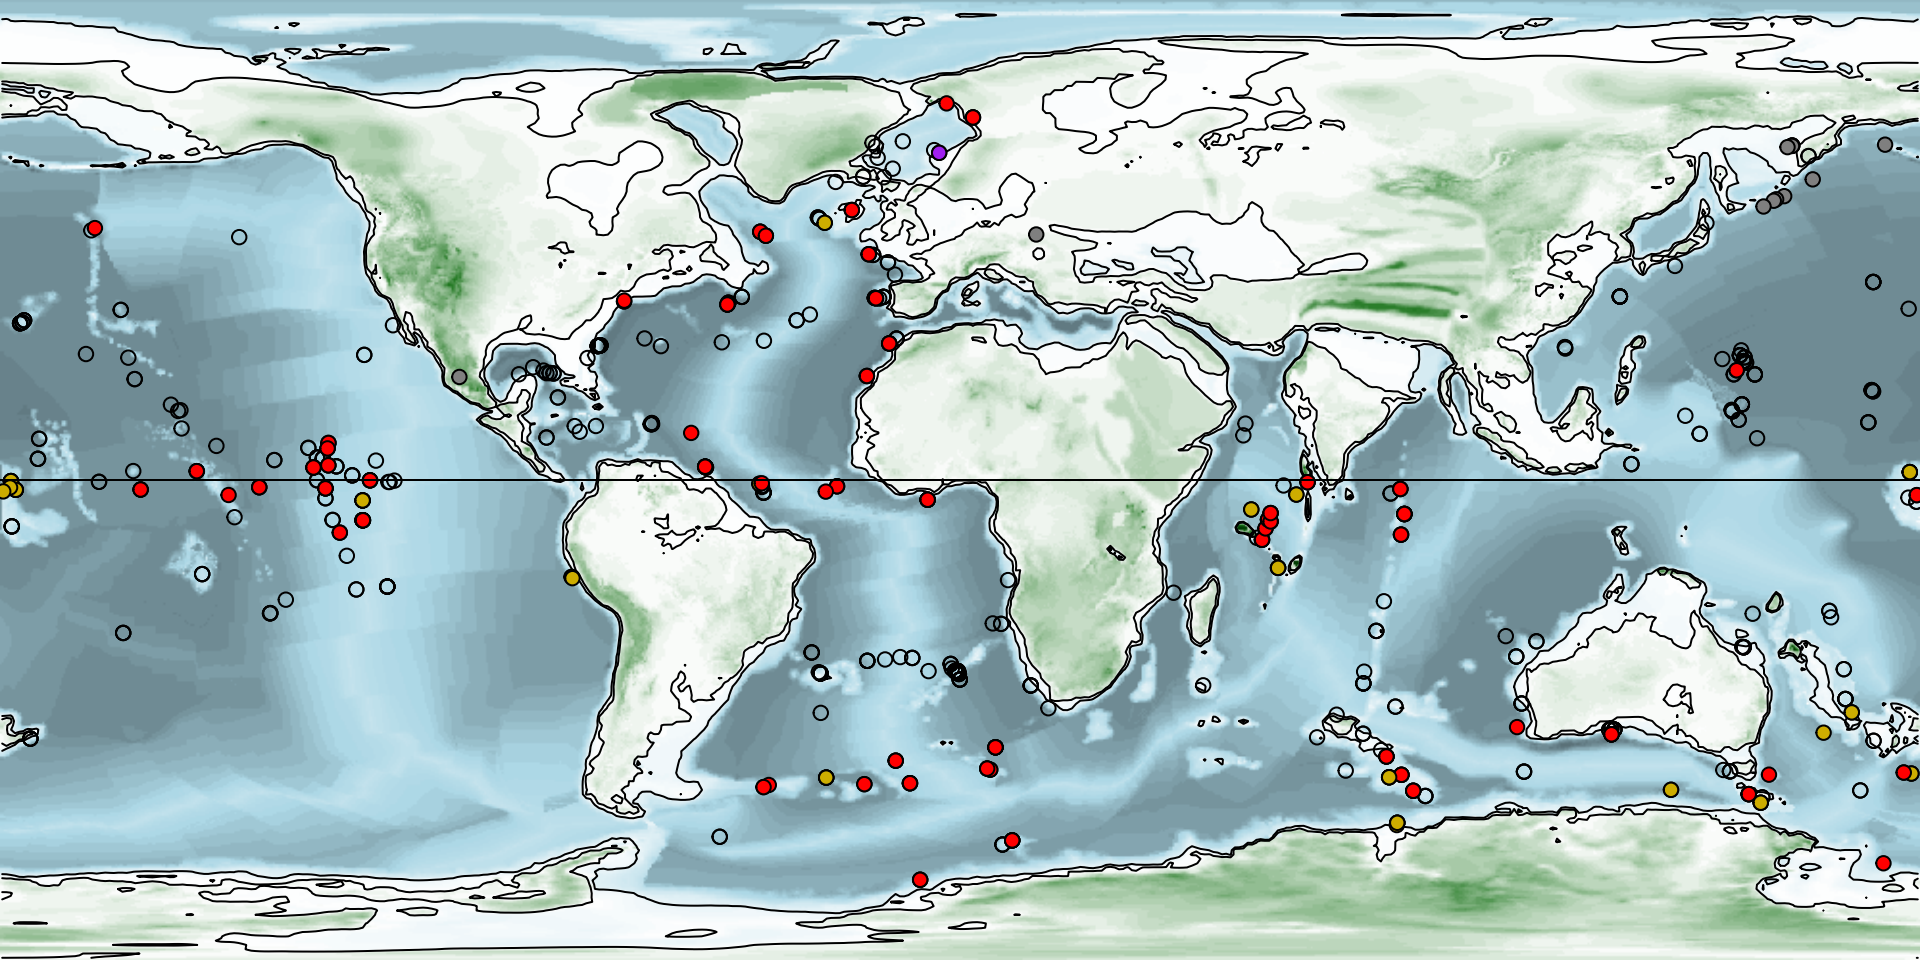

Supplement: Supplementary file 1 [file egusphere-2024-3768-supplement.zip]

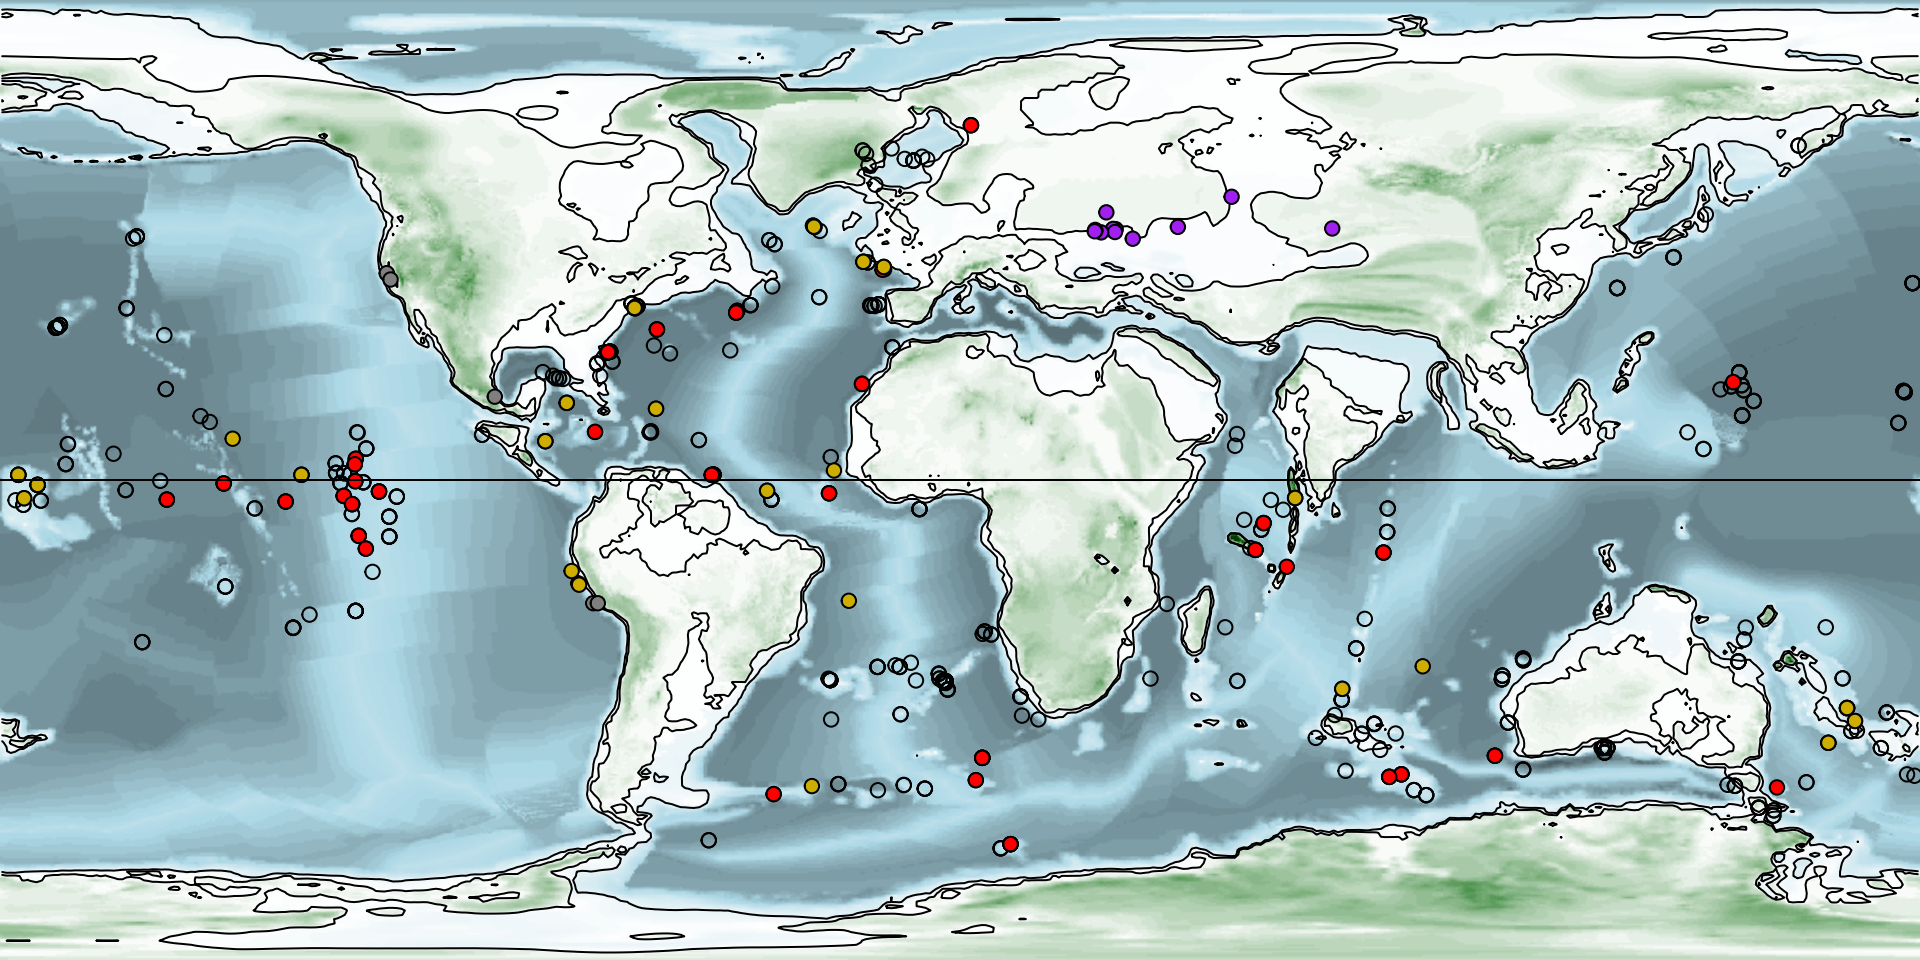

Supplement: Supplementary file 2 [file egusphere-2024-3768-supplement.zip]

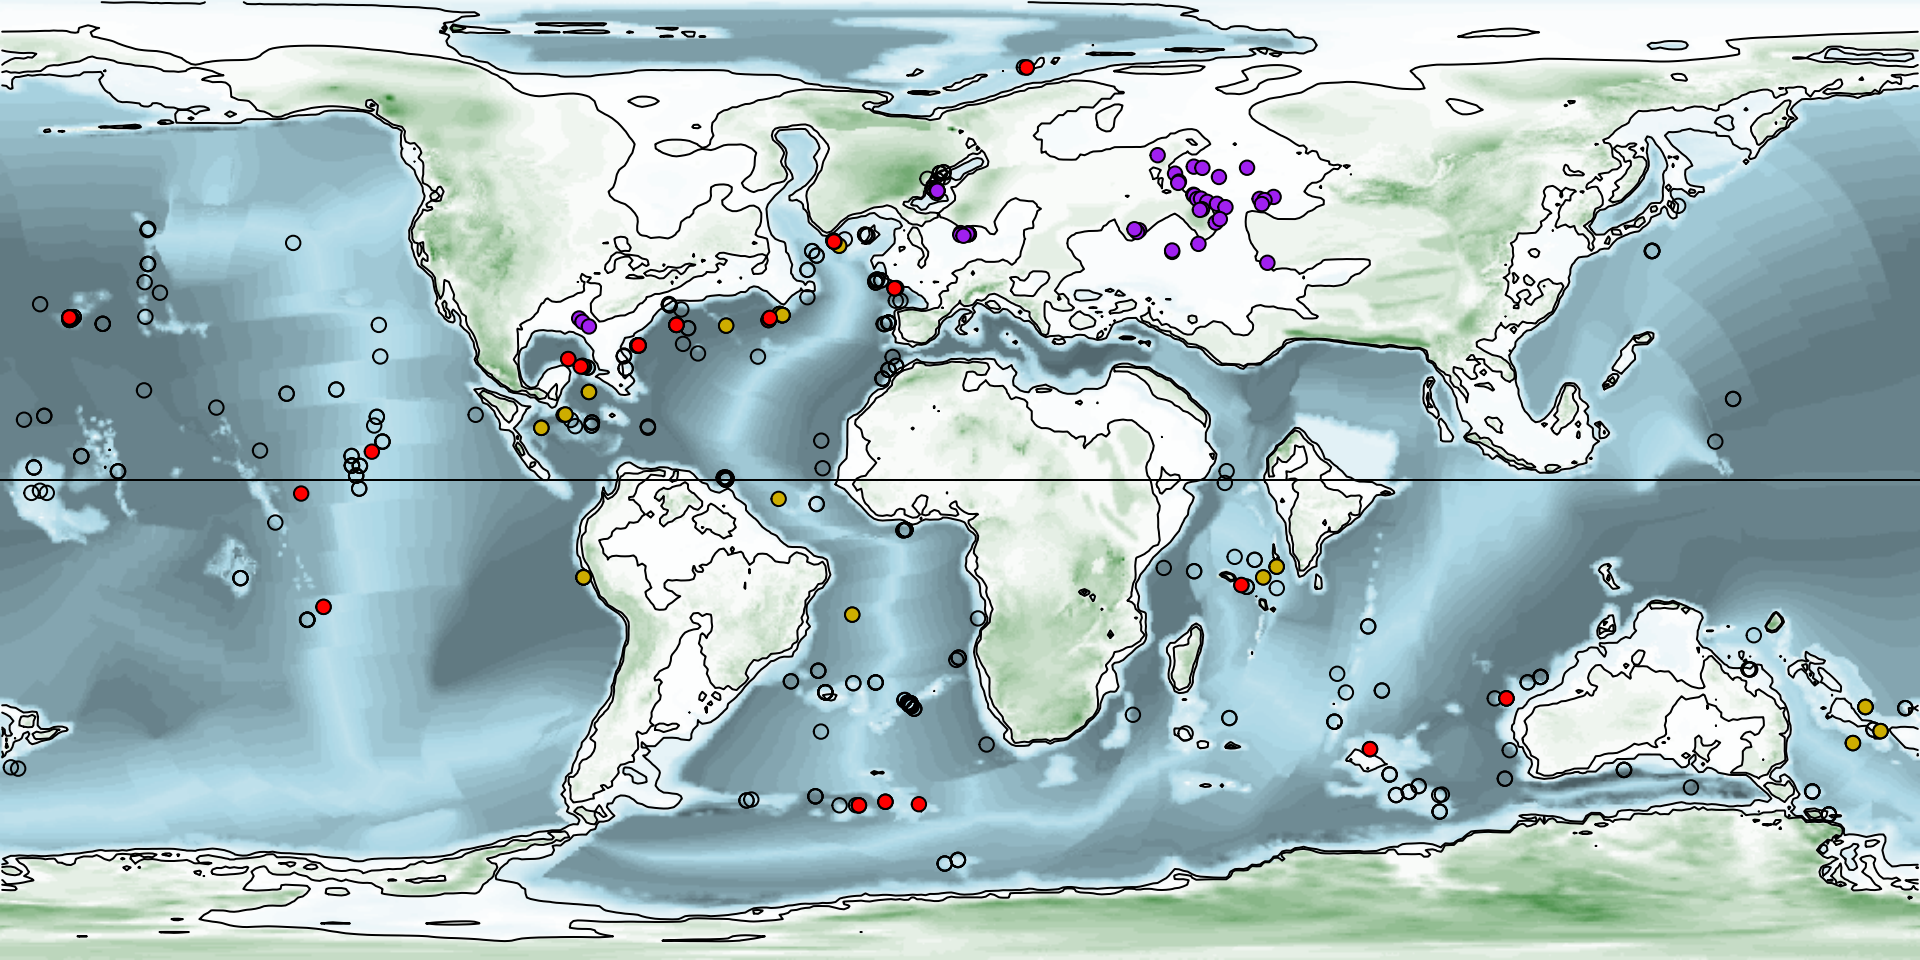

Supplement: Supplementary file 3 [file egusphere-2024-3768-supplement.zip]

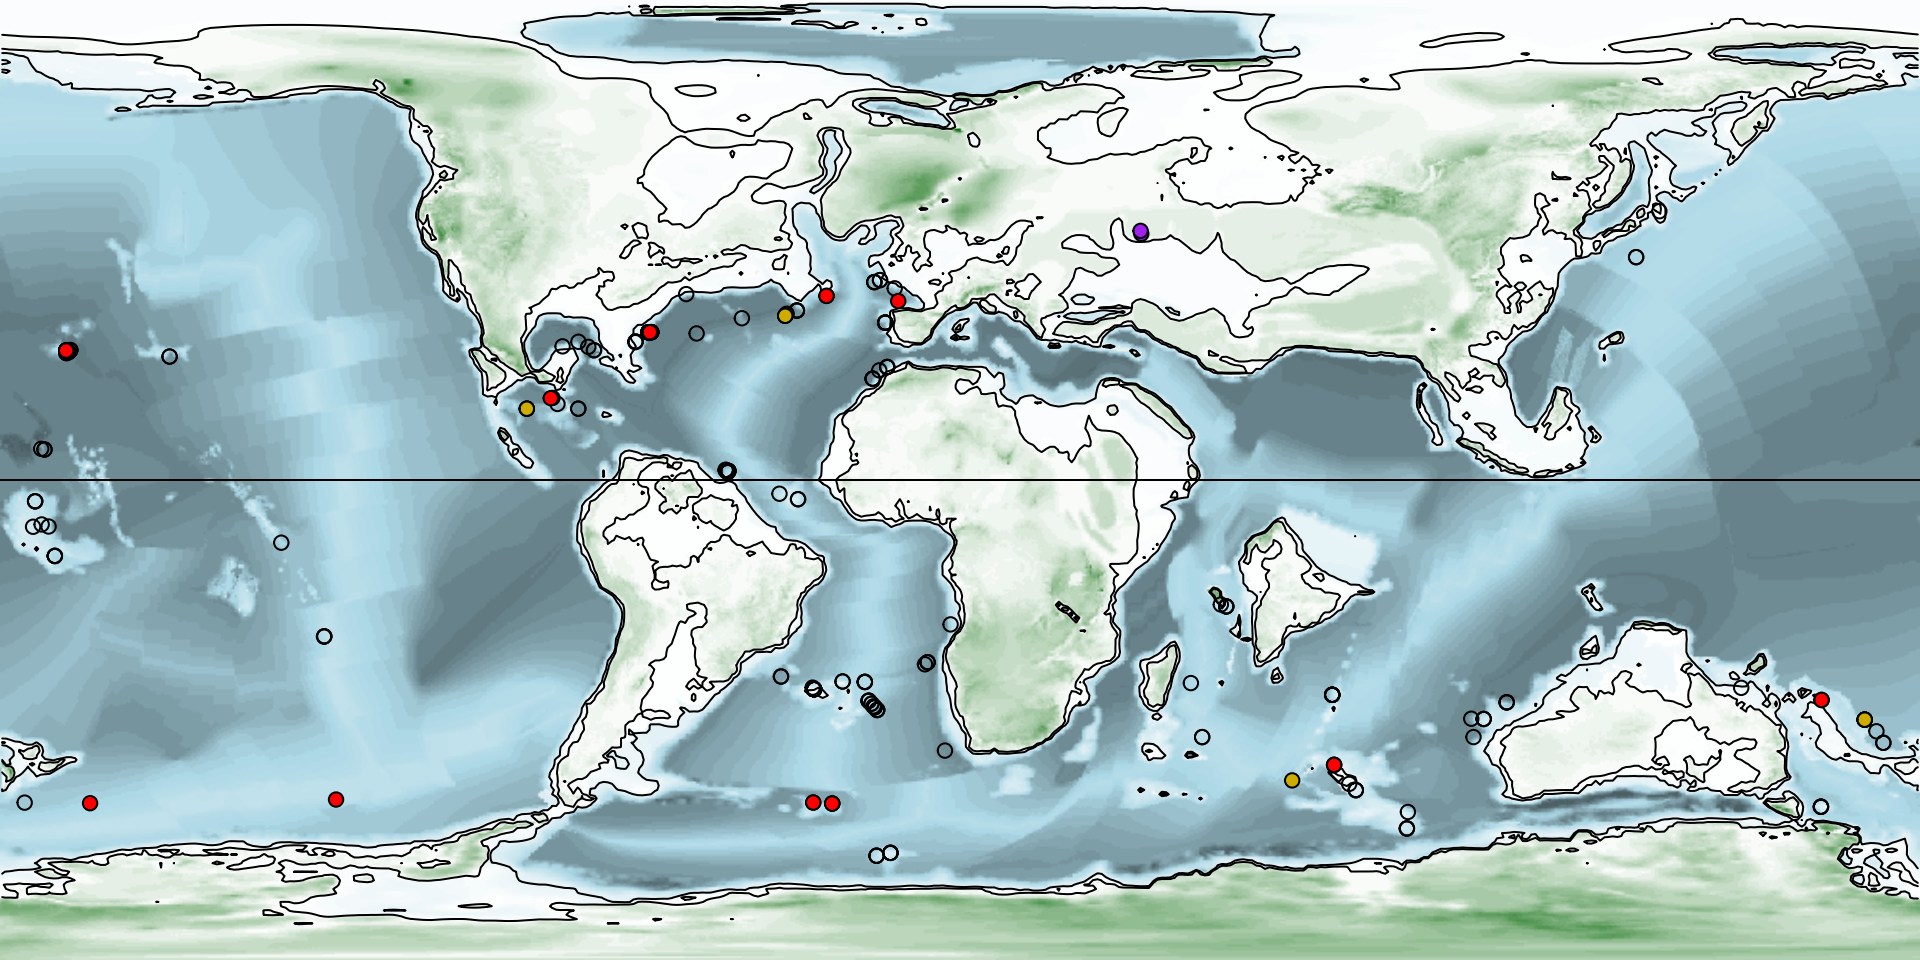

Supplement: Supplementary file 4 [file egusphere-2024-3768-supplement.zip]

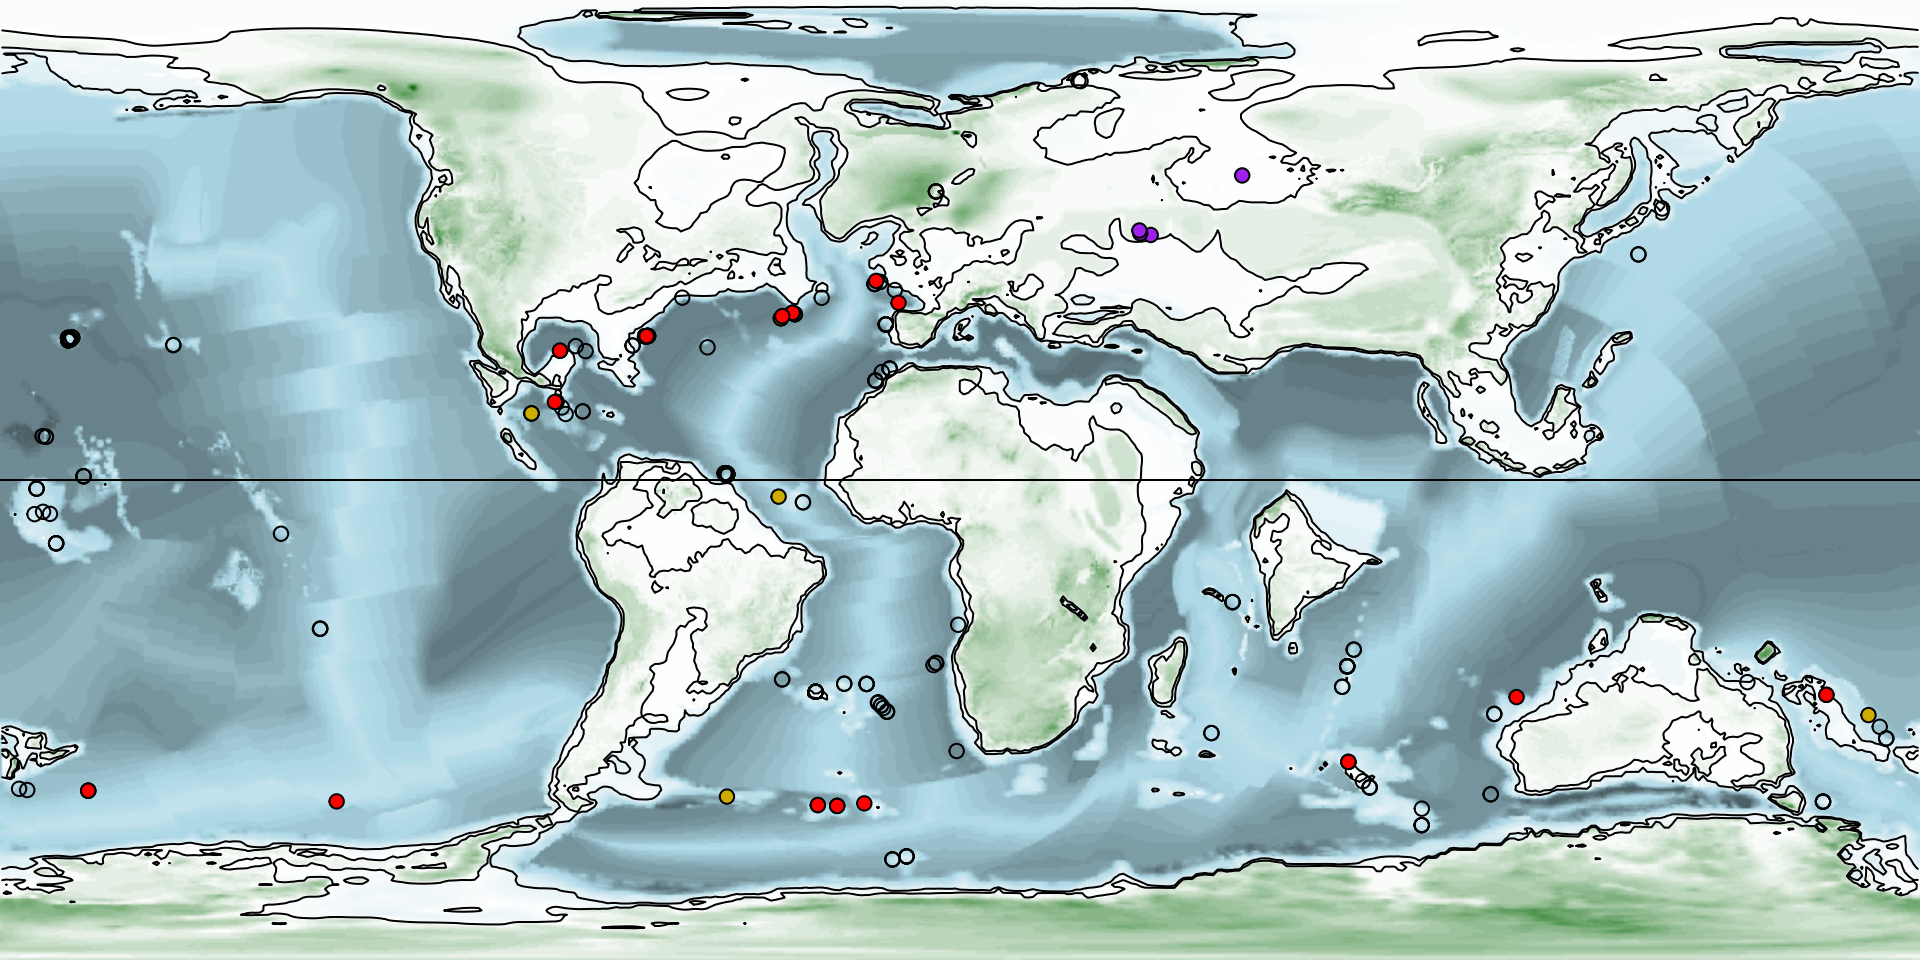

Supplement: Supplementary file 5 [file egusphere-2024-3768-supplement.zip]

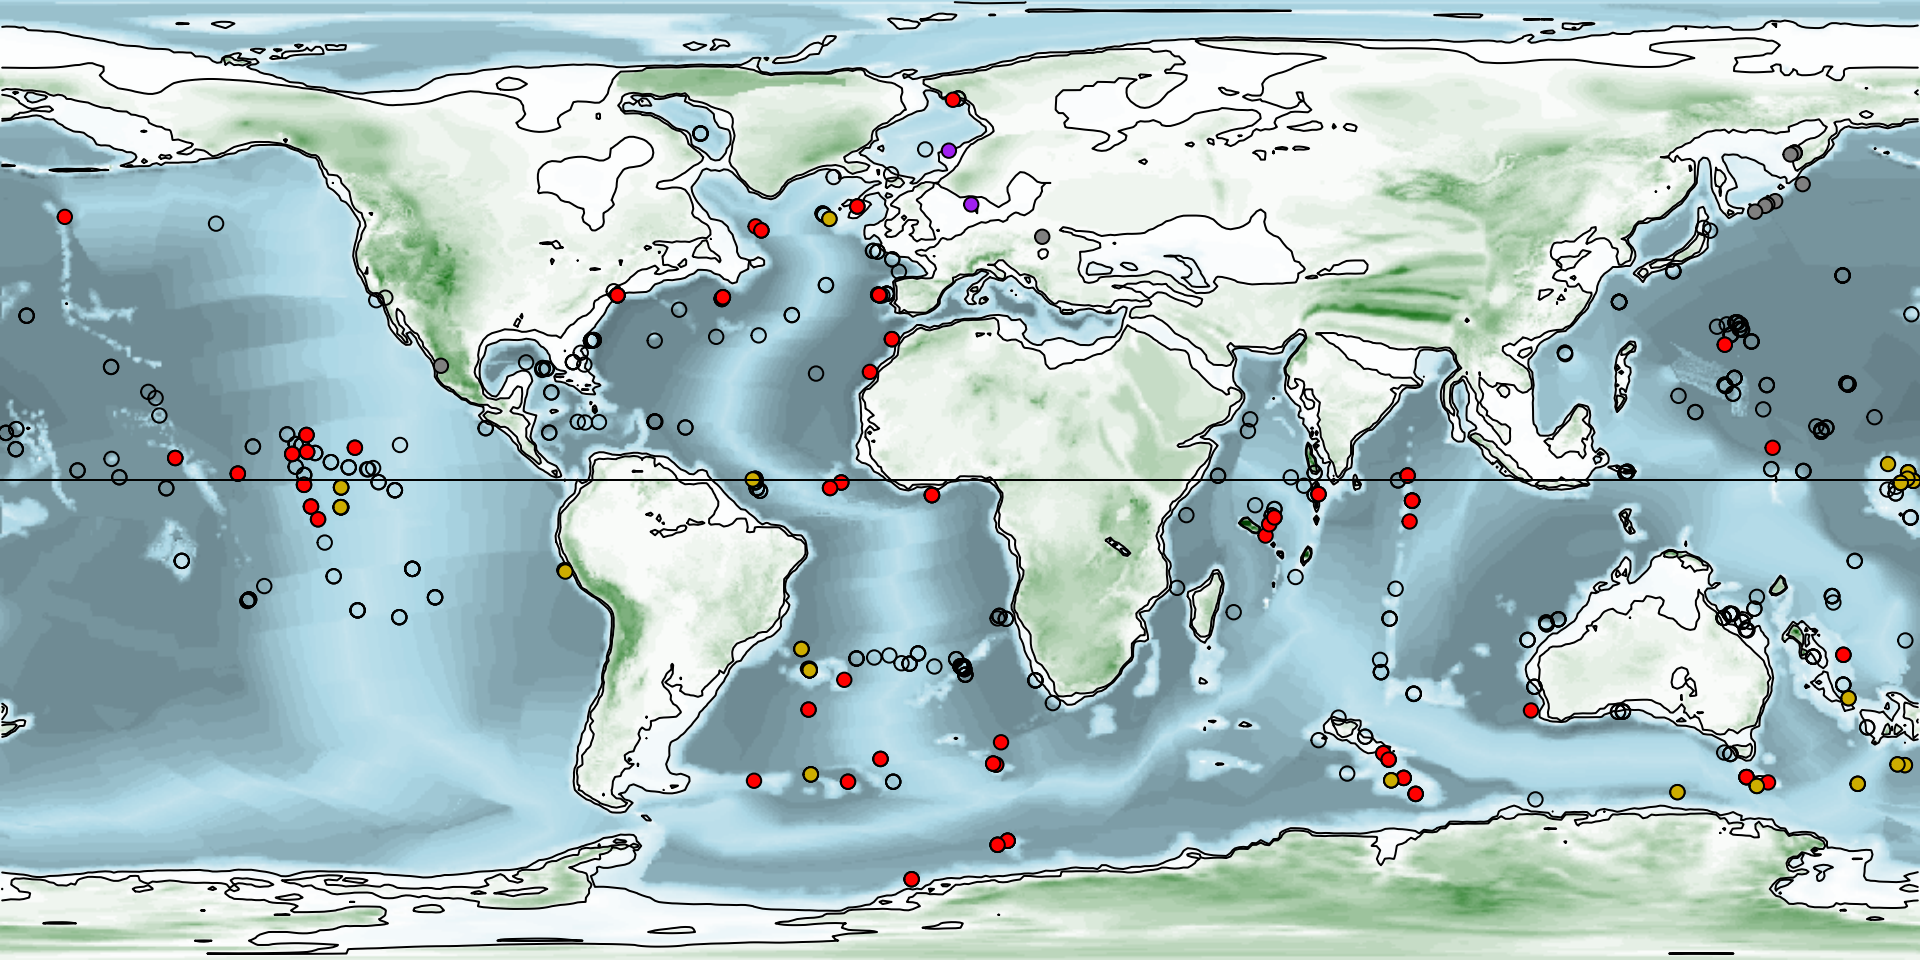

Supplement: Supplementary file 6 [file egusphere-2024-3768-supplement.zip]

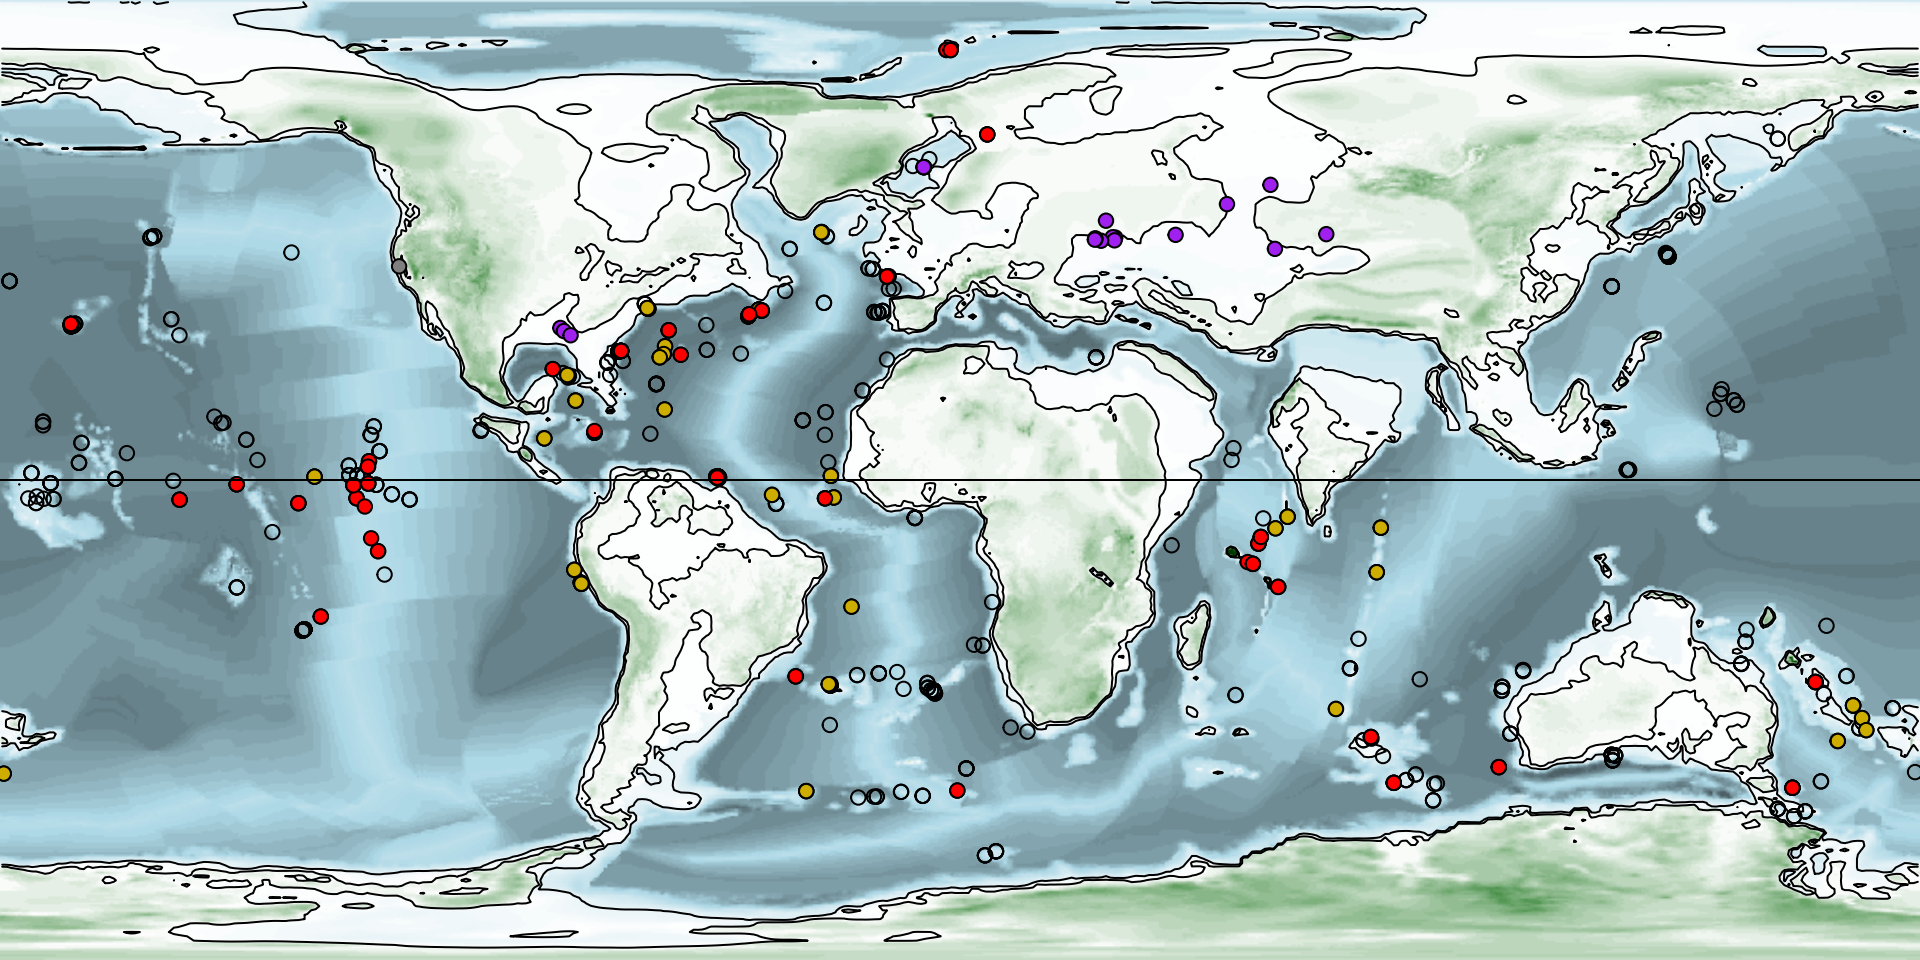

Supplement: Supplementary file 7 [file egusphere-2024-3768-supplement.zip]

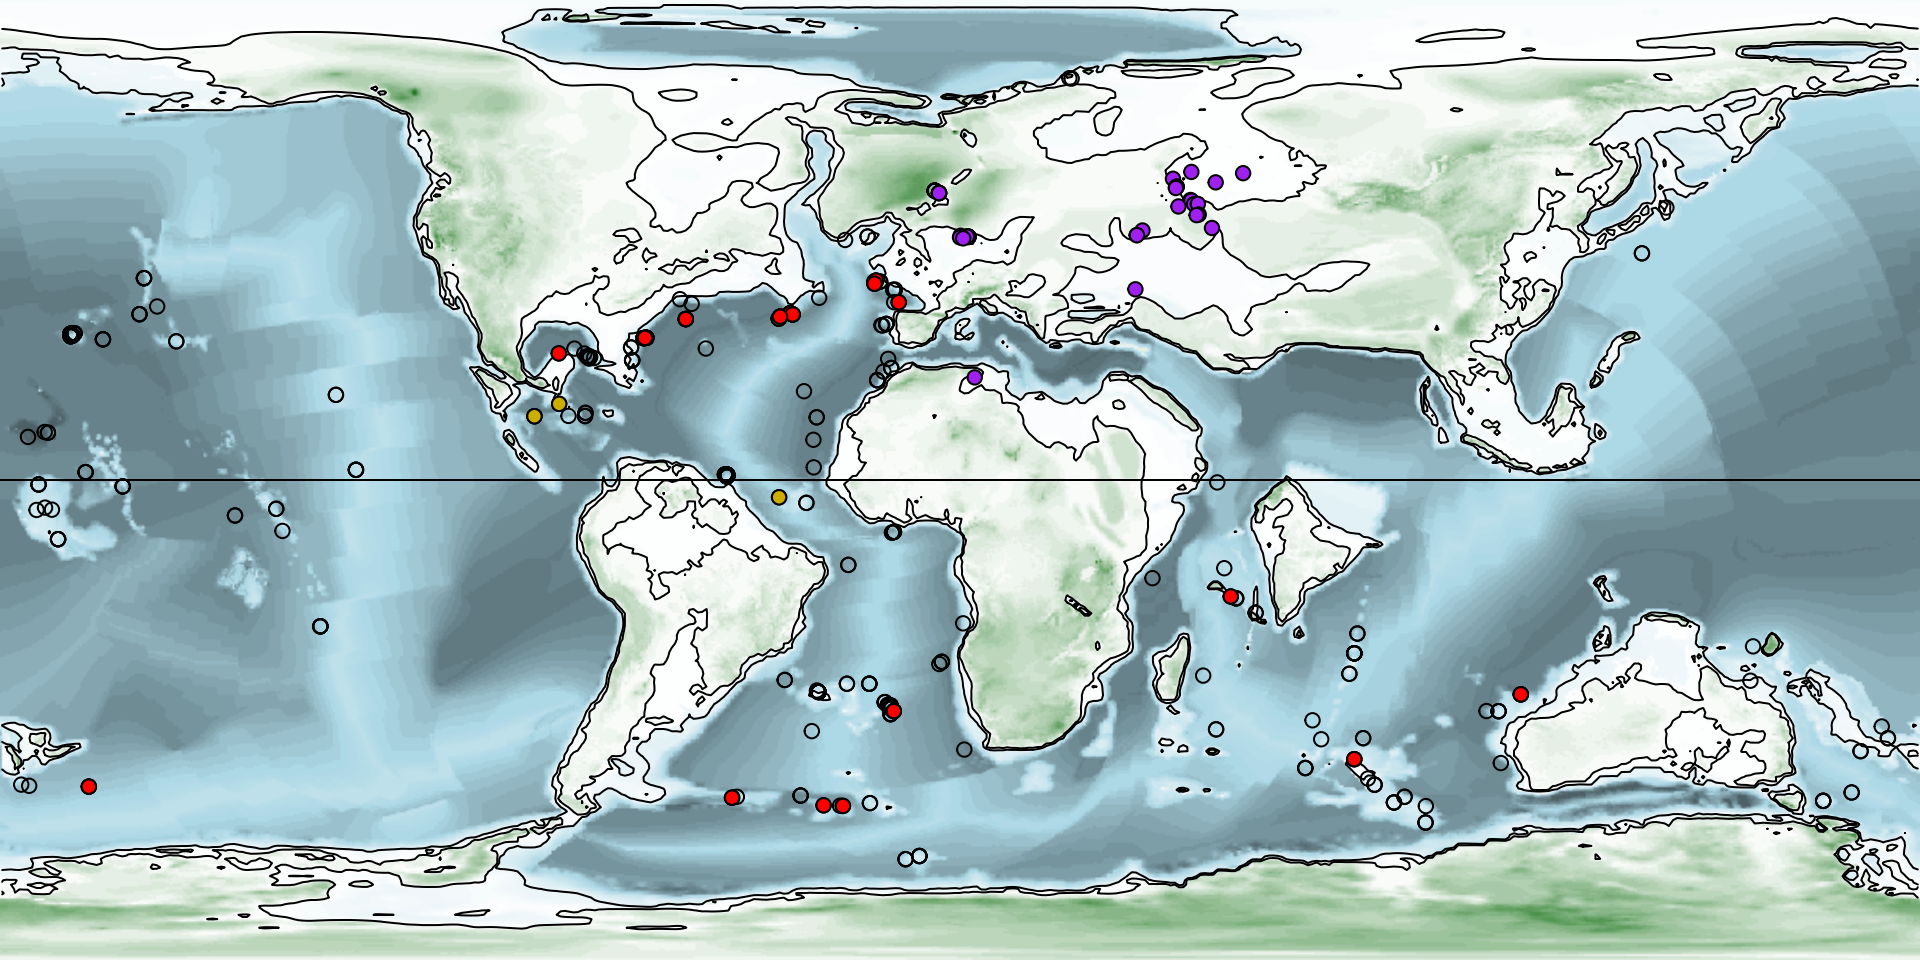

Supplement: Supplementary file 8 [file egusphere-2024-3768-supplement.zip]

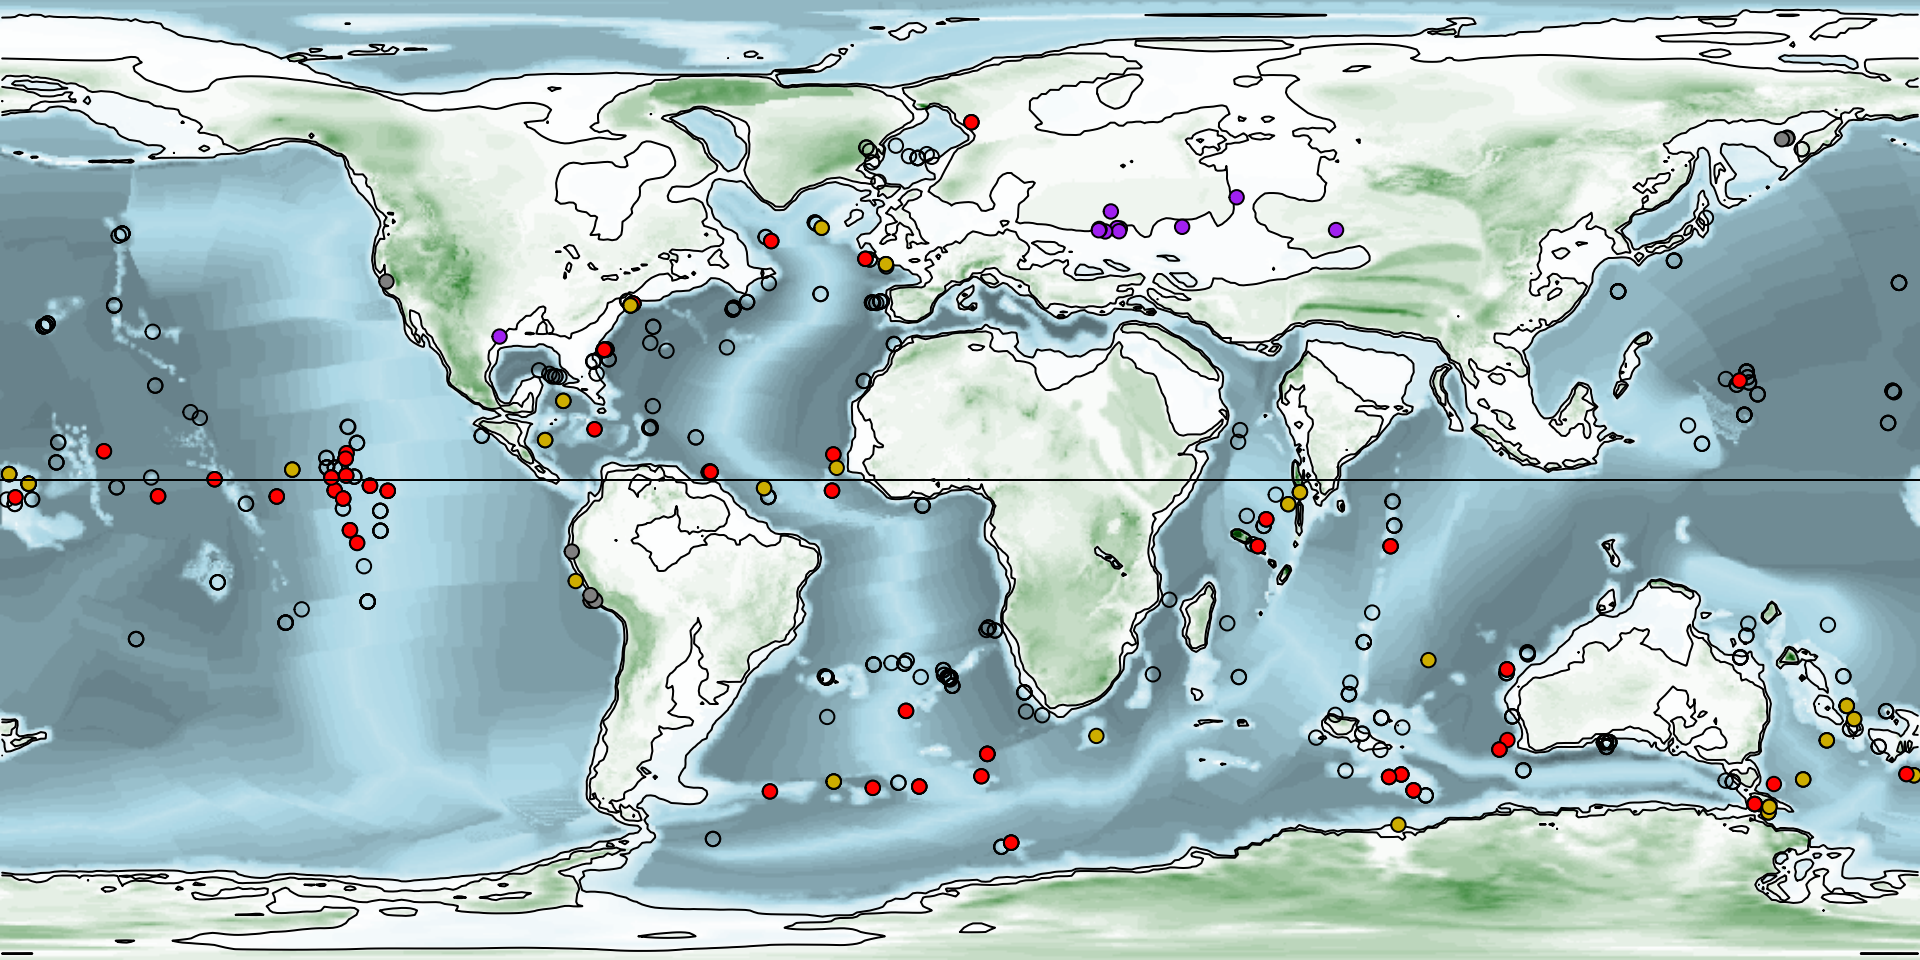

Supplement: Supplementary file 9 [file egusphere-2024-3768-supplement.zip]
